# Supplementary material for: Coupling of Slack and NaV1.6 sensitizes Slack to quinidine blockade and guides anti-seizure strategy development
Source: eLife. 2024 Jan 30;12:RP87559. doi: 10.7554/eLife.87559 (PMC10942592; doi:10.7554/eLife.87559)
Supplement: Figure 1—source data 1. [file elife-87559-fig1-data1.xlsx]

## Sheet: Figure 1
Fig. 1F
quinidine (μΜ)	Slack																			Slack(Nav1.1)																			Slack(Nav1.2)
0.03
0.1
0.3																																							0.924	0.889	0.901	0.947	0.931	0.959	0.979	0.987	0.996705	0.90246
1	0.934	0.934	0.987	0.901	0.987894	0.928102																0.958717		1.00192	1.00906														0.82		0.733		0.847	0.926	0.965	0.856	0.984505	0.801274
3	0.896	0.906	1.05177	0.878384	1.02834	0.775586																0.874493		0.997625	0.91795	0.9432													0.609	0.639	0.661	0.525	0.751	0.877	0.892	0.83	0.942037	0.726334
10	0.861	0.814		0.778767	0.819333	0.790704															0.741108	0.751172		0.858322	0.834156	0.709757													0.436	0.33			0.418	0.645	0.692	0.701	0.801842	0.449741
30	0.745	0.692	0.605206	0.585538		0.680308														0.604628	0.326623	0.399309	0.200196	0.401307	0.368837														0.105	0.15	0.155		0.324	0.361	0.448	0.552	0.612348	0.256752
100	0.506	0.539	0.469757	0.48533	0.475746	0.425767														0.142558	0.307229	0.141847	0.145831	0.111245	0.156128	0.222146																	0.089	0.017	0.151	0.13	0.185583	0.0920951
300	0.221	0.322	0.275855	0.228942																	0.0899526	0.034559	0.0793037		0.108504	0.0329964
1000	0.102	0.198	0.161
Fig. 1K
	Control												3 μM quinidine
WT	0.86517	0.5976	0.4681	1.1248	0.4155	0.4674	0.7326	0.14987	0.63387	0.79309	0.264	0.2536	0.36725	0.3739	0.2422	0.4898	0.1768	0.4479	0.51285	0.08156	0.25311	0.46941	0.12549	0.14617
NaV1.6-KO	0.14935	0.9933	0.9848	0.5148	0.404	0.2765	0.1413	0.4101	0.5824	0.9878			0.21525	0.7995	0.9379	0.4451	0.36393	0.24726	0.1408	0.3206	0.6425	0.7907

## Sheet: Figure 1–figure supplement 1
Figure 1–figure supplement 1A
Slack	Slack(NaV1.1)	Slack(NaV1.2)	Slack(NaV1.3)	Slack(NaV1.6)	Slack(GluA1)	Slack(GluA2)	Slack(GluA3)	Slack(GluA4)
25.5	39.5372	89.5	45.4721	74.2526	40.0453	29.4103	45.4448	35.1407
30.8	67.3377	85	79.5772	93.5912	20.7182	34.026	32.7291	33.3925
39.4794	60.0691	84.5	64.1909	90.8117	40.7006	45.7078	26.8192	41.4505
41.4462	79.9804	67.6	45.562	82.4554	37.2101	34.6859	38.1707	30.3453
31.9692	59.8693	63.9	45.9399	93.8071	44.1185	31.1067	44.5855	45.409
	63.1163	55.2	48.528	97.9595	30.1748
28.2439		44.8	34.5464	82.0737
43.5261		38.7652	86.1686
39.422		74.3248	59.8443
40.3077			71.1382
			45.3297

## Sheet: Figure 1–figure supplement 2
Figure 1–figure supplement 2B
quinidine (μΜ)	KCNT2+NaV1.6										KCNT2
0.3	0.9451	0.99	0.9642
1	0.834285	0.883649	0.893659	0.813449	0.898956	0.999678	0.876615
3	0.615076	0.615733			0.724828	1.00065		0.723762			0.957753				0.976527
10	0.515992	0.476366	0.551292	0.555803	0.474512	0.741393	0.611554	0.61658			0.870218		0.858814	0.956	0.952876
30	0.415606	0.306018	0.317704	0.347912	0.376377	0.427002	0.381335	0.564974			0.677462	0.667841		0.875676	0.661634
100	0.110053	0.182203	0.288507	0.206959	0.165616	0.124204	0.18669	0.447016			0.545449	0.509953	0.365359	0.546344	0.488751
300	0.0294275		0.14949	0.148345			0.123953				0.389863	0.284704	0.253142	0.383207	0.20363
1000			0.028171								0.163331	0.099319	0.104607	0.103025

## Sheet: Figure 1–figure supplement 3
Figure 1–figure supplement 3A
WT	NaV1.6-KO
0.86517	0.14935
0.5976	0.9933
0.4681	0.9848
1.1248	0.5148
0.4155	0.404
0.4674	0.2765
0.7326	0.1413
0.14987	0.4101
0.63387	0.5824
0.79309	0.9878
0.264
0.2536
Figure 1–figure supplement 3B
Na+-activated K+ current (nA)	Ιnhibitory rate of 3 μΜ quinidine (%)
0.86517	57.5517
0.5976	37.4331
0.4681	48.2589
1.1248	56.4545
0.4155	57.4489
0.4674	4.17202
0.7326	29.9959
0.14987	45.5795
0.63387	60.0691
0.79309	40.8125
0.264	52.4659
0.2536	42.362
