# Supplementary material for: Coupling of Slack and NaV1.6 sensitizes Slack to quinidine blockade and guides anti-seizure strategy development
Source: eLife. 2024 Jan 30;12:RP87559. doi: 10.7554/eLife.87559 (PMC10942592; doi:10.7554/eLife.87559)
Supplement: Figure 2—source data 1. [file elife-87559-fig2-data1.xlsx]

## Sheet: Figure 2
Fig. 2B
quinidine (μΜ)	Slack+TTX																			Slack(Nav1.6)																			Slack(Nav1.6)+TTX
0.03																				0.948494	0.958711	1.04681	0.989678	0.974	0.992951	0.931768		1.00787	0.906619			0.931131			0.867576	0.982236
0.1																					0.732561	0.850915	0.88	0.897		0.867412	1.04148	0.872586	0.826903	0.749566	0.786948	1.0644				0.802252
0.3																				0.705802	0.51091	0.878202	0.654	0.674	0.765912		0.742166	0.887166	0.809148	0.725887	0.56104	0.877405	0.760037	0.845697	0.549099	0.440093		0.915028
1	0.9988	0.9728	0.970651																	0.588		0.621836	0.483	0.37	0.555203	0.379949	0.65301	0.598183	0.392563	0.637567	0.440122	0.550453	0.446502	0.573636	0.473853	0.196405	0.463888	0.756224		0.929679		0.854286		1.0335
3	0.986707	0.91996	0.816995																	0.25	0.327	0.183159	0.167	0.371	0.325797	0.210619	0.355951	0.415777	0.0101274	0.562635	0.323272	0.350926		0.363094	0.316905	0.147943	0.246046	0.462212	0.987185	0.760001				0.914313	0.787934
10		0.83799	0.782845																	0.027	0.173	0.0914374		0.123		0.0736105	0.0760426			0.34813	0.12305	0.205831		0.267711	0.127612	0.099517		0.225856	0.838987	0.629912	0.857232	0.571389	0.467678	0.864799	0.570996
30		0.712762	0.62274																											0.257474	0.064088	0.091883		0.175446	0.061929	0.020405		0.179263	0.384773	0.435267	0.54774	0.380736	0.327566	0.725444	0.362335
100		0.528427	0.439936	0.488876	0.381541																																		0.178192	0.132182	0.446201	0.17786	0.262274		0.237274
300		0.195012	0.228606																																							0.089335	0.035524		0.129595
1000	0.0178492		0.0914022
Fig. 2D
Voltage (mV)	HP=-90 mV						HP=-40 mV
-120	-0.0020605	-0.0017808	-0.0050924	-0.0026002			-0.0433429	-0.0090438	-0.0156291	-0.0004668
-110	-0.0020994	-0.0042691	-0.0027401	-0.0034489			-0.0402336	-0.0058969	-0.0167583	-0.0032145
-100	-0.0007859	0.00018506	-0.0019234	-0.0028104			-0.0402974	-0.0092738	-0.0135661	-0.0050852
-90	0.00263629	-0.0021665	-0.0001761	-0.0016769			-0.0392019	-0.0079764	-0.0101016	0.00415548
-80	0.00232644	0.00279451	0.00146174	0.0046689			-0.0339054	-0.0056764	-0.0069138	0.00639576
-70	0.00493702	0.00229842	0.00265315	-0.003777			-0.0275026	-0.0031285	-0.0075037	0.0016512
-60	0.00881408	0.015035	0.00316433	-0.0012441			-0.0185992	-0.0096901	-0.008869	0.00611307
-50	0.0158909	0.00881294	0.00485778	-0.0001592			-0.0144371	-0.0031406	-0.006047	-0.0041516
-40	0.0280491	0.0223683	0.00939058	0.00395936			0.00437017	0.00118666	0.00146467	0.00238774
-30	0.0503229	0.0269838	0.0201211	0.0128417			0.0201168	0.0147787	0.0163857	0.0170661
-20	0.0665869	0.0517154	0.0387391	0.0218431			0.0456709	0.0367795	0.030662	0.0279562
-10	0.0899944	0.0670088	0.0745379	0.061523			0.0859324	0.0454496	0.061612	0.0939223
0	0.118795	0.111957	0.101498	0.115541			0.12861	0.0800521	0.0810048	0.109293
10	0.166184	0.130092	0.146174	0.161413			0.181173	0.0851081	0.10676	0.130686
20	0.238452	0.196966	0.19404	0.233678			0.238137	0.120298	0.159216	0.223272
30	0.276931	0.286121	0.276889	0.28283			0.322307	0.184438	0.181122	0.220042
40	0.385063	0.334368	0.341783	0.309057			0.371466	0.204376	0.255118	0.309594
50	0.46811	0.362888	0.426653	0.392367			0.466714	0.272391	0.326935	0.353922
60	0.558	0.459984	0.499983	0.49265			0.578649	0.355908	0.354487	0.382968
70	0.63665	0.594863	0.615556	0.540707			0.598461	0.49968	0.444495	0.523604
80	0.713386	0.712628	0.67931	0.65742			0.699434	0.555828	0.553597	0.654947
90	0.84605	0.847657	0.9105	0.834346			0.832018	0.617314	0.643311	0.805265
100	1	1	1	1			0.944033	0.801262	0.716381	0.788127
Fig. 2E
quinidine (μΜ)	pre=-90 mV																			pre=-40 mV
0.03	0.948494	0.958711	1.04681	0.989678	0.974	0.992951	0.931768		1.00787	0.906619			0.931131			0.867576	0.982236
0.1		0.732561	0.850915	0.88	0.897		0.867412	1.04148	0.872586	0.826903	0.749566	0.786948	1.0644				0.802252
0.3	0.705802	0.51091	0.878202	0.654	0.674	0.765912		0.742166	0.887166	0.809148	0.725887	0.56104	0.877405	0.760037	0.845697	0.549099	0.440093		0.915028
1	0.588		0.621836	0.483	0.37	0.555203	0.379949	0.65301	0.598183	0.392563	0.637567	0.440122	0.550453	0.446502	0.573636	0.473853	0.196405	0.463888	0.756224	0.887166	0.827161	0.81661	0.973534	1.08618
3	0.25	0.327	0.183159	0.167	0.371	0.325797	0.210619	0.355951	0.415777	0.0101274	0.562635	0.323272	0.350926		0.363094	0.316905	0.147943	0.246046	0.462212	0.88486	0.794207	0.962373	0.871141	0.968282
10	0.027	0.173	0.0914374		0.123		0.0736105	0.0760426			0.34813	0.12305	0.205831		0.267711	0.127612	0.099517		0.225856	0.486677	0.563755	0.649632	0.706668	0.752834
30											0.257474	0.064088	0.091883		0.175446	0.061929	0.020405		0.179263	0.189917	0.508339	0.54067	0.551098	0.383604
100																				0.0889257		0.384742	0.284179	0.135385
300																				0.0295986		0.119869		0.0189563
1000
Fig. 2G
Voltage (mV)	KCNT1+NaV1.6						KCNT1+NaV1.6+Riluzole
-120	-0.00326	0.001866	0.000759	-0.00104477	-0.00352	-0.00423	-0.00212	0.008663	0.02721	-0.00415	-0.0317	-0.00705
-110	-0.00209	0.002744	0.007652	-0.00105081	-0.00355	-0.04803	-0.00146	0.002314	-0.00597	-0.00198	-0.00483	-0.00248
-100	-0.00151	0.002047	-0.00191	0.000354096	-0.00054134	0.000741	-0.00134	-0.00038	-0.00408	-0.00214	-0.00632	-0.01183
-90	0.000321	-0.00042	0.005476	3.08723e-05	-0.00013799	0.000605	7.02e-05	-0.00211	0.02519	-0.0676	0.002426	0.016065
-80	0.001507	-0.00273	-0.00804	9.53216e-05	0.00139	-0.00155	0.000872	-0.00073	0.007475	0.000967	-0.00136	0.002012
-70	0.003023	-0.00391	-0.01861	0.000372683	0.001045	0.001	0.00208	-0.0038	-0.00474	0.00449	0.001643	0.002674
-60	0.005002	-0.00114	-0.03168	0.00213953	0.004884	0.003078	0.007483	-0.00627	0.036255	0.004631	0.00439	0.004524
-50	0.008283	-0.00432	-0.02158	0.00438472	0.009271	0.014442	0.016137	-0.0064	-0.00839	0.006183	0.008207	0.006528
-40	0.016836	0.003505	-0.02964	0.00394986	0.020055	0.006469	0.015734	-0.00701	-0.00388	0.015245	0.012836	0.008457
-30	0.023168	0.016046	0.03025	0.0117027	0.026853	0.029408	0.020239	-0.00145	-0.00793	0.024177	0.031357	0.010714
-20	0.039552	0.012032	0.037618	0.0237047	0.046789	0.034278	0.029923	-0.0008	0.013596	0.045713	0.045437	0.018279
-10	0.062769	0.078136	0.083258	0.0419124	0.090858	0.059964	0.038436	0.01339	0.057119	0.062501	0.076511	0.052234
0	0.088457	0.095034	0.125235	0.0674601	0.09047	0.082129	0.058257	0.039415	0.080009	0.091046	0.117841	0.074857
10	0.119668	0.11615	0.244202	0.102843	0.170847	0.11668	0.064519	0.04157	0.126301	0.147881	0.172136	0.107255
20	0.16571	0.146057	0.285147	0.13495	0.220862	0.203423	0.087122	0.069401	0.169078	0.158469	0.231096	0.154251
30	0.245111	0.272617	0.331969	0.206887	0.271469	0.242848	0.118483	0.070415	0.101074	0.224854	0.31884	0.188888
40	0.326543	0.201426	0.439434	0.252313	0.361314	0.272149	0.124715	0.119967	0.139805	0.283428	0.398889	0.28021
50	0.438906	0.435545	0.505815	0.315192	0.388422	0.438196	0.140355	0.093486	0.25455	0.360857	0.54161	0.265328
60	0.511638	0.469743	0.614196	0.412028	0.490384	0.468435	0.180701	0.149181	0.218856	0.429757	0.575176	0.28654
70	0.595763	0.491921	0.686527	0.511767	0.738895	0.652189	0.206865	0.156347	0.372057	0.461916	0.675075	0.392369
80	0.676232	0.757873	0.836598	0.66987	0.768504	0.7055	0.206735	0.16774	0.440787	0.649784	0.718799	0.491088
90	0.820194	0.82953	0.934662	0.753246	0.964217	0.898526	0.266836	0.20354	0.510568	0.760484	0.891309	0.556022
100	1	1	1	1	1	1	0.27063	0.211601	0.436652	0.910088	0.908466	0.611842
Fig. 2H
quinidine (μΜ)	KCNT1(NaV1.6)																			KCNT1(NaV1.6)+Riluzole
0.03	0.948494	0.958711	1.04681	0.989678	0.974	0.992951	0.931768		1.00787	0.906619			0.931131			0.867576	0.982236			0.81723		0.982084	1.04742	0.961828
0.1		0.732561	0.850915	0.88	0.897		0.867412	1.04148	0.872586	0.826903	0.749566	0.786948	1.0644				0.802252			0.752954	0.89686	0.910786	1.04976	0.729582	0.782579
0.3	0.705802	0.51091	0.878202	0.654	0.674	0.765912		0.742166	0.887166	0.809148	0.725887	0.56104	0.877405	0.760037	0.845697	0.549099	0.440093		0.915028		0.369861	0.88012	0.904256	0.738728	0.741867
1	0.588		0.621836	0.483	0.37	0.555203	0.379949	0.65301	0.598183	0.392563	0.637567	0.440122	0.550453	0.446502	0.573636	0.473853	0.196405	0.463888	0.756224	0.424043	0.309568	0.707885	0.810234	0.68865	0.643811
3	0.25	0.327	0.183159	0.167	0.371	0.325797	0.210619	0.355951	0.415777	0.0101274	0.562635	0.323272	0.350926		0.363094	0.316905	0.147943	0.246046	0.462212	0.256942	0.205067	0.564153		0.529839	0.401895
10	0.027	0.173	0.0914374		0.123		0.0736105	0.0760426			0.34813	0.12305	0.205831		0.267711	0.127612	0.099517		0.225856	0.168331	0.174969	0.330186		0.281537	0.17568
30											0.257474	0.064088	0.091883		0.175446	0.061929	0.020405		0.179263	0.0920617	0.101312	0.183048		0.117786
Fig. 2J
quinidine (μΜ)	NaV1.1								NaV1.2								NaV1.3								NaV1.5								NaV1.6
1									0.958686	0.978596	0.986651						0.953389	0.940026	0.939372	0.947716	1.0135	0.943171											0.992962	0.956519	0.97894
3	0.982444	0.995117	1.00503	0.998111	1.00984				0.926418	0.964762	0.855872						0.943918	0.938165	0.92894	0.897981	0.929289	0.90381			0.99515	1.01715	0.911671	1.00068	1.02846	1.00367			0.982544	0.88021	0.855117	0.968993
10	0.914743	0.959723	0.976679	0.951475	0.974092				0.876841	0.891652	0.830499							0.78703	0.78839	0.81901	0.799888	0.82367			0.839941	0.867709	0.888548		0.941429	0.848936			0.804866	0.829188	0.674577
30	0.90021	0.918604	0.802791	0.922297	0.889592				0.645001	0.691662	0.701149							0.605052	0.613909	0.657511	0.652001	0.61954			0.564783	0.520605	0.610476		0.694665	0.486263			0.663913	0.661507	0.645868
100		0.610933	0.568456	0.547615	0.589764				0.360569	0.44827	0.551856							0.312999	0.410662	0.418685	0.386646	0.410051			0.209419	0.210105	0.260916	0.139846	0.320298	0.177073			0.359994	0.269185	0.337808	0.169262
300		0.224827	0.296375	0.200317	0.185806				0.116974	0.151445	0.130467								0.103219	0.096069	0.106004	0.066719			0.022558	0.0516216	0.212904		0.0723236	0.0214868			0.0308622	0.0439313	0.194814	0.0309705
1000				0.0335949	0.0194283

## Sheet: Figure 2–figure supplement 1
Figure 2–figure supplement 1A
base	100 nM TTX
0.50228	0.008773
0.60085	0
0.31501	0
0.79079	0.027755
1.1535	0
2.591	0.063178
0.40556	0
Figure 2–figure supplement 1B
base	100 nM TTX
4.23533	0
9.38764	0
3.205	0
6.7363	1.10171
2.27039	0.461023
4.8846	0.875994
4.173	0
Figure 2–figure supplement 1D
Voltage (mV)	control						100 nM TTX
-120	-0.00181	-0.0039	-0.00285	-0.00139	-0.01849		-0.00436	-0.00679	-0.00152	-0.00125	-0.01351
-110	-0.00257	-0.00213	-0.00185	-0.00161	-0.02048		-0.00215	-0.00253	-0.00177	-0.00111	-0.01785
-100	-0.00086	-0.0018	-0.00092	-0.00028	-0.00903		-0.0018	-0.0015	-0.00084	-0.00078	0.003002
-90	0.001315	1.47e-05	-5.8e-05	0.000137	-0.01269		0.000411	0.001064	2.56e-05	-0.00031	-0.00964
-80	0.001728	0.001202	0.001107	0.000576	0.006654		0.001756	0.000503	0.001306	0.001456	-0.00451
-70	0.001937	0.003168	0.003262	0.002656	0.007587		0.002536	0.004333	0.002779	0.002786	0.002659
-60	0.002326	0.007649	0.005552	0.00433	0.029424		0.0061	0.006759	0.005708	0.004263	0.021963
-50	0.006806	0.012667	0.01016	0.007958	0.033247		0.011354	0.009629	0.009872	0.007567	0.036252
-40	0.013103	0.020864	0.017066	0.012249	0.032334		0.013593	0.017369	0.013888	0.012367	0.056163
-30	0.023592	0.026599	0.02353	0.021903	0.056418		0.024612	0.026541	0.023897	0.019872	0.006893
-20	0.028651	0.048741	0.043004	0.033112	0.062172		0.044166	0.035335	0.033509	0.034356	0.067516
-10	0.041908	0.069091	0.052168	0.049771	0.078547		0.063087	0.052774	0.052543	0.049052	0.077239
0	0.080247	0.100099	0.073521	0.078241	0.14403		0.088712	0.078032	0.076613	0.070168	0.070418
10	0.10908	0.147116	0.109209	0.104159	0.218589		0.139567	0.115995	0.109693	0.105916	0.160467
20	0.169049	0.181662	0.151524	0.145599	0.306646		0.157342	0.164351	0.13707	0.151339	0.295487
30	0.226063	0.261612	0.225644	0.19098	0.333499		0.218489	0.208005	0.199382	0.186126	0.340159
40	0.284341	0.343753	0.280051	0.260832	0.430069		0.296117	0.271047	0.253226	0.240615	0.47127
50	0.408549	0.417204	0.353478	0.358848	0.60029		0.393344	0.384782	0.349445	0.321835	0.515068
60	0.470991	0.536722	0.464935	0.429538	0.686411		0.498377	0.43714	0.453438	0.372713	0.754168
70	0.623474	0.665401	0.555514	0.548497	0.801426		0.648261	0.601552	0.540041	0.473317	0.746883
80	0.712732	0.812433	0.697889	0.700859	0.894939		0.750425	0.753295	0.653158	0.573162	0.967668
90	0.911293	0.926723	0.849817	0.820667	0.981862		0.794465	0.896363	0.79396	0.650526	1.0629
100	1	1	1	1	1		1.04801	1.00594	0.953323	0.792998	1.25596

## Sheet: Figure 2–figure supplement 2
Figure 2–figure supplement 2A
prepulse (mV)	INaT													INaP
-90	1	1	1	1	1	1									1	1	1		1
-80	0.989734	1.02342	0.974757	1.00929	1.02092	1.06213									1.18205	1.08522	1.14172	1	0.887634
-70	0.928345	0.999937	0.942427	0.993819	1.03389	0.944207									0.951228	0.696226		1.10597	0.876843
-60	0.766364	0.882589	0.847192	0.905249	0.84386	0.840989									0.996054	1.00539	0.951538	1.0152	0.795228
-50	0.344288	0.491693	0.640058	0.543497	0.403942	0.459539									0.855103	0.844613	1.00212		0.711232
-40	0.052487	0.106272	0.193446	0.1561	0.109292	0.085685									0.697526	0.702253	1.06041	0.665914	0.667359
-30	0.001139	0.023387	0.006479	0.00846	0.050334	0.024362									0.71167	0.49279	0.579738	0.0324	0.756979
-20	0.00354	0.007566	0.001992	0.001481	0.032458	-0.00487									0.576793	0.350229	0.470341	-0.04343	0.624854
-10	-0.00529	-0.00339	-0.00105	-0.01095	0.010615	-0.00285									0.436326	0.046749	0.042375	-0.03341	0.374781
0	-0.0048	-0.00943	-0.00153	-0.0046	0.001018	0.000458									0.286694	0.146487	0.042284	-0.069714	-0.04292
Figure 2–figure supplement 2B
riluzole (μΜ)	INaT						INaP
0.003		1.002	0.999	0.996819				1.002		1.004
0.01						0.996			0.997			1.004
0.03	1.002	0.998		0.984059	1.049			0.963		0.958	0.999954
0.1		0.977	1	0.953101	1.035	1.066			0.869	0.928	0.825087	0.991
0.3		0.978	0.999	0.953511	0.956		0.7308	0.704	0.649	0.821	0.644548	0.722
1	0.998	0.989	0.932	0.936236	0.955		0.5729	0.518	0.433	0.648	0.594878	0.41
3	0.983	0.953	0.932	0.930284	0.948		0.1177	0.279	0.202	0.377	0.306859	0.204
10	0.917	0.908	0.872	0.92204	0.936		0.0321	0.117	0.002	0.252	0.140512	0.131
30	0.706	0.69	0.713	0.75165	0.665	0.768		-0.074		0.061	0.0611903	0.052
100	0.398	0.179		0.438545	0.257	0.352	-0.0072
Figure 2–figure supplement 2D
Voltage (mV)	Slack						Slack+Riluzole
-120	-0.00347	-0.00493	-0.00326	-0.00319	-0.00238		-0.00455	-0.00049	-0.00305	-0.00255	-0.00511
-110	-0.00202	-0.00267	-0.00181	-0.00317	-0.00142		-0.00329	-0.00047	-0.00181	-0.00205	-0.00089
-100	-0.001	-0.00179	-0.00094	-0.00091	-0.00166		-0.00159	-0.00114	-0.0012	-0.00086	-0.00213
-90	-2.9e-05	-0.00066	-0.00017	0.000154	-0.00047		0.00035	0.000118	-8.7e-05	0.00075434	-0.00136
-80	0.001266	0.000396	0.001008	0.001283	0.00033		0.002312	0.001092	0.00114	0.001221	0.002334
-70	0.002641	0.001823	0.003007	0.00255	0.002471		0.005375	0.00297	0.003713	0.00398	0.003527
-60	0.005891	0.003526	0.004616	0.005953	0.004885		0.009442	0.005172	0.00639	0.006245	0.008665
-50	0.009536	0.00789	0.00796	0.010519	0.00715		0.016916	0.008809	0.011408	0.009367	0.016359
-40	0.012772	0.014022	0.012557	0.017444	0.012525		0.02619	0.013658	0.016872	0.012887	0.018947
-30	0.025867	0.022368	0.019563	0.022268	0.01805		0.038236	0.021824	0.026037	0.021206	0.03084
-20	0.033051	0.032409	0.030168	0.041873	0.025586		0.056984	0.035461	0.037393	0.042426	0.056431
-10	0.049483	0.050137	0.044997	0.063141	0.038962		0.075881	0.048512	0.056041	0.056609	0.069139
0	0.079481	0.082028	0.073624	0.086594	0.06627		0.113159	0.066595	0.082169	0.076733	0.093602
10	0.107337	0.104226	0.103404	0.111148	0.0945		0.156677	0.098632	0.11462	0.135772	0.130819
20	0.157905	0.150473	0.135676	0.159418	0.138684		0.222657	0.13557	0.160286	0.172971	0.185221
30	0.206428	0.206235	0.19028	0.179682	0.192323		0.291225	0.201117	0.214547	0.250551	0.226883
40	0.269151	0.267743	0.26113	0.255268	0.249939		0.342158	0.251234	0.295027	0.303049	0.335743
50	0.350171	0.337203	0.326252	0.339449	0.32416		0.432675	0.315148	0.35322	0.383569	0.41399
60	0.454912	0.418321	0.427517	0.440442	0.445761		0.553187	0.391508	0.46047	0.485237	0.493742
70	0.543098	0.542545	0.537344	0.569977	0.544033		0.724553	0.509622	0.556851	0.550303	0.538605
80	0.713773	0.686047	0.658549	0.657859	0.676349		0.802891	0.620609	0.680029	0.706338	0.669375
90	0.828929	0.771849	0.798405	0.79038	0.83772		0.974273	0.744222	0.823186	0.877812	0.795998
100	1	1	1	1	1		1.13034	0.887859	0.954253	1.00109	0.92923

## Sheet: Figure 2–figure supplement 3
Figure 2–figure supplement 3F
quinidine (μΜ)	NaV1.1(Slack)												NaV1.2(Slack)												NaV1.3(Slack)												NaV1.5(Slack)												NaV1.6(Slack)
1	0.991616	1.021		0.994741									0.996081	0.989293	1.01969													0.993	1.036	0.992349	0.989997	0.943309		0.904029	0.911559		1.01493	0.945284	1.07339			0.957982
3	0.974801			0.995766	1.00178								0.989756	0.951076	0.986925											0.988	0.957	0.928	0.987	0.958554	0.969618	0.909404	0.953339	0.853516	0.919164	0.966517	1.00005			0.830603		0.933653
10	0.93862	0.885	0.868957		0.887674	0.876765							0.82826	0.883463	0.850434										0.899				0.975	0.849675	0.641184	0.721312	0.877297		0.796787	0.888202	0.520635	0.887601	1.00404	0.733757		0.944705	0.973608						0.808133
30	0.833517	0.778	0.756312										0.705574	0.637217	0.713958										0.706	0.841	0.813	0.754	0.783	0.678979	0.567735	0.547157	0.774269		0.820747	0.718894	0.239047	0.540445	0.498546	0.645343	0.415278	0.774514	0.72102	0.61793	0.892208				0.686027
100	0.470551	0.42	0.447098		0.64325	0.607136							0.322894	0.356876	0.483451										0.518	0.631	0.612			0.40022	0.320876	0.23439	0.484552	0.45475			0.0694669				0.0732892								0.116267
300	0.291398	0.199	0.202757			0.197132							0.1	0.1013	0.2137										0.24	0.265	0.224			0.0573206	0.120476	0.0307313																	0.0513973
1000		0.071											0.0667	0.02345											0.01
[truncated: 4 more columns]

## Sheet: Figure 2–figure supplement 4
Figure 2–figure supplement 4A
Voltage (mV)	Slack										Slack+NaV1.6
60	0.0445	0.05061	0.03342	0.05056	0.1999	0.12912	0.05064	0.07588	0.07298	0.05188	0.04778	0.16023	0.04363	0.13112	0.06174	0.02194	0.08175	0.04011	0.08155	0.0517
70	0.08964	0.03639	0.03007	0.05748	0.07212	0.10871	0.12409	0.06139	0.08608	0.06449	0.06194	0.05268	0.05288	0.15048	0.05233	0.09602	0.09262	0.05575	0.06435	0.05456
80	0.04062	0.05132	0.03207	0.05322	0.1008	0.08556	0.12196	0.07125	0.12991	0.10452	0.0377	0.04364	0.07484	0.1691	0.10519	0.04954	0.08533	0.10315	0.12872	0.13984
90	0.04052	0.04148	0.03983	0.05133	0.08406	0.09978	0.08072	0.09885	0.08621	0.09212	0.09432	0.02727	0.08202	0.12821	0.13238	0.14205	0.10164	0.09108	0.11866	0.0902
100	0.04104	0.04273	0.03252	0.05823	0.18398	0.10884	0.11311	0.09105	0.11801	0.08401	0.09249	0.05564	0.06236	0.18303	0.11618	0.05666	0.11504	0.08398	0.1482	0.07347
Figure 2–figure supplement 4B
Voltage (mV)	Slack												Slack+NaV1.6
-120	-0.00517	-0.00281	-0.0014	0.000458	-0.00296	-0.00268	-0.00277	0.000775	-0.00462	-0.00449	-0.00913	-0.01639	-0.00495	-0.00689	-0.01251	-0.0042	-0.00206	-0.00178	-0.00509	-0.00118	-0.00326	-0.00104	-0.00423	-0.00938
-110	-0.00053	-0.00181	-0.00158	-0.00052	-0.00171	-0.0034	-0.00057	0.000399	-0.00261	-0.00155	-0.00071	-0.01117	-0.00369	-0.00368	-0.0057	-0.00188	-0.0021	-4.3e-05	-0.00274	-0.00081	-0.00209	-0.00105	-4.8e-05	-0.0046
-100	0.003445	-0.00091	-0.00033	-2.7e-05	-0.00076	-0.00103	-0.00192	-0.0008	-3.5e-05	0.001138	0.001408	-0.00294	-0.00186	-0.00372	-0.00546	-0.00412	-0.00079	0.000185	-0.00192	-0.00028	-0.00151	0.000354	0.000741	-0.00295
-90	0.001169	-7.9e-05	0.000121	-8.6e-05	-0.00047	0.000111	-0.00039	-0.00154	-0.00102	-0.00067	-0.00377	0.000572	0.00019	-0.00038	0.00034	-0.00381	0.002636	-2.2e-05	-0.00018	-6.1e-05	0.000321	3.09e-05	0.000605	0.00011
-80	-0.00095	0.001159	0.000487	0.000212	0.000956	0.001249	0.000115	-0.0001	0.000393	-0.00063	-0.00103	0.007645	0.001741	0.001821	0.00615	-0.00094	0.002326	0.002795	0.001462	0.000481	0.001507	9.53e-05	-0.00155	0.003033
-70	0.000363	0.003315	0.002644	0.000288	0.002815	0.002375	0.002521	0.000502	0.002283	0.000969	0.006518	0.01545	0.003702	0.003789	0.010027	0.001014	0.004937	0.002298	0.002653	0.001714	0.003023	0.000373	0.001	0.005501
-60	-0.00031	0.005508	0.004201	0.001856	0.004396	0.005696	0.004592	0.003355	0.010528	0.00297	0.0012	0.022038	0.005901	0.010048	0.013665	-9.7e-05	0.008814	0.015035	0.003164	0.003177	0.005002	0.00214	0.003078	0.010013
-50	0.001181	0.010114	0.008082	0.003491	0.006749	0.009721	0.007851	0.005825	0.01346	0.001867	0.001254	0.029884	0.008906	0.009628	0.021968	0.004856	0.015891	0.008813	0.004858	0.005109	0.008283	0.004385	0.014442	0.012538
-40	0.005426	0.017117	0.012272	0.007832	0.011818	0.016499	0.013019	0.013994	0.020838	0.005259	0.006364	0.053885	0.010908	0.015621	0.031882	0.007219	0.028049	0.022368	0.009391	0.007965	0.016836	0.00395	0.006469	0.020844
-30	0.010861	0.023524	0.022049	0.014609	0.019782	0.020242	0.019218	0.021791	0.020623	0.008658	0.017741	0.052118	0.022396	0.035876	0.034121	0.021752	0.050323	0.026984	0.020121	0.012367	0.023168	0.011703	0.029408	0.026107
-20	0.024835	0.043032	0.03305	0.023791	0.029665	0.041732	0.028191	0.029587	0.030066	0.015277	0.032198	0.087876	0.040364	0.049247	0.03176	0.019912	0.066587	0.051715	0.038739	0.017707	0.039552	0.023705	0.034278	0.027098
-10	0.047527	0.052189	0.049933	0.035584	0.043972	0.056824	0.032739	0.051638	0.042828	0.030156	0.045044	0.135152	0.047064	0.08827	0.005239	0.057168	0.089994	0.067009	0.074538	0.025293	0.062769	0.041912	0.059964	0.057925
0	0.076275	0.073462	0.078263	0.059198	0.065797	0.08691	0.06749	0.093879	0.067419	0.043974	0.071886	0.208229	0.063111	0.155096	-0.00898	0.097812	0.118795	0.111957	0.101498	0.045131	0.088457	0.06746	0.082129	0.081404
10	0.100644	0.109175	0.104181	0.082715	0.094381	0.101626	0.106155	0.129879	0.120215	0.07145	0.119225	0.199492	0.080463	0.172708	0.038108	0.151595	0.166184	0.130092	0.146174	0.07856	0.119668	0.102843	0.11668	0.108057
20	0.129681	0.151463	0.145653	0.106894	0.129438	0.15457	0.135731	0.149614	0.185197	0.122127	0.15713	0.258693	0.145017	0.209266	0.109016	0.208519	0.238452	0.196966	0.19404	0.116542	0.16571	0.13495	0.203423	0.179522
30	0.18429	0.225591	0.190914	0.160149	0.170328	0.199567	0.186914	0.239839	0.184781	0.134737	0.214025	0.383258	0.167363	0.281353	0.198615	0.308899	0.276931	0.286121	0.276889	0.173059	0.245111	0.206887	0.242848	0.261251
40	0.261726	0.280046	0.260812	0.215033	0.256902	0.252898	0.27073	0.3129	0.327542	0.242115	0.297022	0.444132	0.293277	0.320785	0.229858	0.369877	0.385063	0.334368	0.341783	0.234548	0.326543	0.252313	0.272149	0.324613
50	0.300916	0.353496	0.358868	0.307986	0.308351	0.332212	0.336085	0.495327	0.380025	0.303673	0.344422	0.431963	0.325252	0.448337	0.361596	0.463583	0.46811	0.362888	0.426653	0.310806	0.438906	0.315192	0.438196	0.397296
60	0.42095	0.464865	0.429464	0.402622	0.426813	0.405774	0.468552	0.498248	0.430534	0.382757	0.447888	0.600119	0.477661	0.505334	0.424888	0.543252	0.558	0.459984	0.499983	0.409229	0.511638	0.412028	0.468435	0.560247
70	0.5249	0.555556	0.548359	0.551473	0.512509	0.545567	0.521748	0.64299	0.572175	0.494286	0.614379	0.674836	0.559132	0.528617	0.549153	0.668428	0.63665	0.594863	0.615556	0.510489	0.595763	0.511767	0.652189	0.639042
80	0.689708	0.697926	0.700564	0.688971	0.623183	0.617542	0.673316	0.748746	0.691196	0.649102	0.769839	0.834142	0.694675	0.745565	0.669676	0.728659	0.713386	0.712628	0.67931	0.650446	0.676232	0.66987	0.7055	0.71473
90	0.787716	0.849821	0.820763	0.845527	0.749662	0.761529	0.798316	0.819192	0.895857	0.857517	0.887961	0.860296	0.847665	0.905535	0.801327	0.863861	0.84605	0.847657	0.9105	0.802616	0.820194	0.753246	0.898526	0.867015
100	1	1	1	1	1	1	1	1	1	1	1	1	1	1	1	1	1	1	1	1	1	1	1	1
Figure 2–figure supplement 4C
Membrane Potential (mV)	NaV1.6												NaV1.6+Slack												NaV1.6												NaV1.6+Slack
-120																									0.965835	0.912929	0.985633	0.991252	0.934018	0.928821	0.920346	0.999162	0.992245	0.919397	0.910153		0.956788	0.915682	0.98143	0.946848	0.986283	0.977932	0.903605
-110																									0.980355	0.896001	1	0.995606	0.93893	0.902436	0.924313	1	0.993374	0.976385	0.890409		0.962021	0.899163	1	0.948916	0.980405	0.954653	0.84692
-100																									0.95736	0.929897	0.992499	0.997964	0.983639	0.999297	0.999396	0.997891	1	0.947621	0.941768		0.984393	0.936809	0.998631	0.987499	0.990941	1	0.989327
-90																									0.960607	1	0.986383	1	1	0.91752	0.953488	0.991333	0.988781	1	0.95945		0.961028	1	0.98273	1	0.977118	0.921266	0.921506
-80	-0.00023	-0.00145	-8.5e-05	-0.00016	0.000285	0.000319	0.000426	0.000192		-0.00021	0.000475		-9.7e-05	-0.00114	0.000517	0.001125	0.000769	0.003185							1	0.938051	0.988518	0.994477	0.976204	0.986024	0.996859	0.996071	1.02748	0.990465	1		1	0.978779	0.966172	0.966454	1	0.887767	1
-70	2.94e-05	-0.00037	-0.00013	0.000123	-0.00015	0.002297	-0.00171	-0.00022		-0.00145	0.001027		-0.00026	-0.00067	0.001096	0.00121	-0.00359	-0.00304							0.944168	0.954421	0.934857	0.99607	0.962725	1	1	0.996042	0.998042	0.946159	0.927898		0.956879	0.930783	0.991043	0.978685	0.998554	0.881307	0.859736
-60	-0.00133	-0.00117	-7e-05	-0.00033	0.000231	0.003172	-0.00224	-0.0002		-0.0014	0.000997		-0.00029	-7.6e-05	0.001533	-0.00037	-0.00796	-0.00936							0.874939	0.811841	0.713115	0.912483	0.88572	0.917818	0.938246	0.947279	0.92734	0.84798	0.80908		0.812503	0.776444	0.950481	0.864619	0.854333	0.828692	0.778973
-50	-0.00225	-0.0033	0.000384	-9.7e-05	-0.0009	0.005175	-0.00203	-0.00017		-0.00354	0.004312		0.00043	-0.00252	0.006549	0.000681	-0.01433	-0.00297							0.545132	0.448961	0.232866	0.652148	0.557886	0.618448	0.65223	0.79339	0.608501	0.522328	0.462335		0.465593	0.441724	0.740764	0.555832	0.494095	0.706393	0.412816
-40	-0.00422	-0.00157	0.007367	0.000705	0.001682	0.002059	-0.00195	-0.00017		8.94e-05	0.007787		0.004979	-0.00106	0.004236	0.003569	-0.00116	-0.00398							0.115984	0.135642	0.061572	0.212505	0.132816	0.263559	0.217356	0.387104	0.182998	0.092464	0.202316		0.126973	0.079811	0.313688	0.100989	0.090558	0.284724	0.05919
-30	4.14e-05	0.008775	0.092125	0.010509	0.014432	0.008254	0.001352	0.001637		0.012619	0.040583		0.026267	0.01662	0.009288	0.028757	0.009124	0.038351							0.02024	0.05696	0.03895	0.029869	0.071424	0.069717	0.014885	0.08007	0.034739	0.028691	0.138171		0.033147	0.004526	0.037244	0.005932	-0.00507	0.108844	0.033544
-20	0.053353	0.099832	0.426153	0.111549	0.073026	0.030702	0.043842	0.021414		0.138488	0.235693		0.155871	0.124695	0.032835	0.205987	0.158225	0.148016							0.014319	0.040668	0.018302	0.021797	0.070827	0.042099	0.020574	0.009011	0.012554	0.030002	0.099771		0.023054	-0.02784	0.009016	0.005583	-0.00834	0.00102	0.072552
-10	0.274807	0.391569	0.758651	0.530559	0.354665	0.183368	0.284585	0.197271		0.529076	0.636101		0.480329	0.414568	0.191183	0.696052	0.572748	0.526677							0.021377	0.038895	0.020582	0.014172	0.075831	0.029891	0.010424	0.005692	0.008859	0.01326	0.0214		0.017262	-0.02044	0.001252	-0.01048	-0.02538	-0.04082	0.08607
0	0.653854	0.696731	0.971238	0.808078	0.654038	0.515612	0.6944	0.68586		0.840698	0.940899		0.76104	0.717471	0.560249	0.926509	0.918745	0.709445							0.012209	0.020469	0.01482	0.008696	0.085164	0.013014	0.009427	-0.00141	0.004441	0.013821	0.000515		0.006494	-0.02115	-0.00082	-0.0031	-0.02684	-0.02972	0.050223
10	0.886768	0.944208	1.00001	0.948268	0.902309	0.776258	0.943139	0.938517		0.999999	1		0.935038	0.774967	0.857255	0.982075	1	0.852971							0.016461	0.023172	0.005945	0.005972	0.037775	0.016954	0.007199	0.002606	0.004497	0.014221	-8.5e-05		0.006884	0.004763	0.007149	0.002532	-0.00974	-0.02249	0.045856
20	0.980697	0.957984	0.883008	0.990688	0.98341	0.995358	0.999559	0.993326		0.953572	0.955032		0.992432	0.981424	0.952869	0.966864	0.966781	0.935325
30	1	0.888877	0.830998	0.961227	0.945107	1	0.998589	1		0.939184	0.92319		0.967046	0.951062	1	0.911557	0.982086	0.983544
40	0.970604	1	0.905671	1	1	0.993844	1	0.991995		0.959224	0.976966		1	1	0.945445	1	0.975251	1
Figure 2–figure supplement 4D
Membrane Potential (mV)	NaV1.6												NaV1.6
-120													1	1	0.991931	0.980117	1
-110													0.990577	0.991383	1	0.970196	0.995176
-100													0.983958	0.998265	0.97644	0.984829	0.988543
-90													0.985091	0.965896	0.979592	1	0.987305
-80	0.000221	-0.00013	0.00096	0.00029	-0.00012								0.910007	0.973282	0.913237	0.967798	0.908248
-70	0.000707	0.000524	0.003501	0.001022	0.003239								0.724535	0.91607	0.710459	0.869125	0.434733
-60	0.001484	0.001287	0.003727	0.000996	0.004129								0.337756	0.740824	0.252458	0.525526	0.028763
-50	0.00459	0.005012	0.02516	0.003813	0.007995								0.041565	0.314626	0.033143	0.102604	0.064985
-40	0.057521	0.04681	0.277383	0.029942	0.012602								0.001412	0.048917	0.032084	0.009709	0.053696
-30	0.369042	0.778701	0.72168	0.29266	0.044631								0.003876	0.013245	0.016585	0.008573	0.011066
-20	0.73448	1	0.897426	0.767576	0.25444								0.000872	0.009079	0.01309	-0.00415	0.023129
-10	0.902753	0.97297	0.930771	0.852338	0.735786								-0.00101	0.008202	-0.00426	0.000653	0.008196
0	0.970925	0.9473	0.95382	0.931851	1								-0.00011	0.003447	-0.01188	-0.0019	0.01028
10	0.96999	0.934108	0.988864	0.977466	0.88413								0.002763	0.003236	-0.00621	-0.00254	0.020797
20	0.957312	0.914862	0.967112	0.934807	0.826908
30	0.925135	0.929284	1	0.938835	0.858909
40	1	0.933682	0.99909	1	0.919056
Figure 2–figure supplement 4E
Time (ms)	NaV1.6										NaV1.6+Slack
1	0.49199	0.36551	0.34678	0.51489	0.46119	0.62713	0.3427	0.5493			0.36356	0.46232	0.66723	0.55713	0.67689	0.65045	0.33056
2	0.70741	0.55054	0.57885	0.74318	0.67183	0.83905	0.60066	0.71627			0.65928	0.64409	0.89237	0.8024	0.81653	0.78236	0.6218
4	0.76773	0.69288	0.69735	0.81766	0.79142	0.87038	0.70592	0.7861			0.75125	0.6716	0.95398	0.84823	0.88263	0.83037	0.63815
8	0.81142	0.78479	0.76293	0.84157	0.83039	0.91956	0.7943	0.85036			0.80927	0.85607	0.9883	0.90895	0.88045	0.79214	0.62916
16	0.85769	0.7703	0.83035	0.90188	0.88104	0.9346	0.84065	0.93494			0.85483	0.83048	1.03	0.92386	0.90266	0.95399	0.69579
32	0.93124	0.8642	0.90441	0.92225	0.90596	0.96714	0.86454	0.91942			0.86609	0.89317	0.96478	0.95238	0.93142	0.92473	0.9116
64	0.90907	0.89153	0.94055	0.94977	0.95295	0.98389	0.9087	0.99313			0.94068	0.9434	0.98113	0.96396	0.94434	0.94491	0.89421
128	0.91768	0.94823	0.97432	0.9738	0.93826	0.98527	0.9713	0.96484			0.98882	0.8805	0.93004	0.97081	0.94278	0.96364	0.96165
Figure 2–figure supplement 4F
NaV1.6	NaV1.6+Slack
7.79781	2.26103
2.65857	3.7595
3.18375	1.2877
2.36547	2.17888
2.57438	6.45276
1.67612	2.75163
6.07874	0.647185
2.65673	1.79633
	4.57308
	3.06852
	2.8637
