# Supplementary material for: Coupling of Slack and NaV1.6 sensitizes Slack to quinidine blockade and guides anti-seizure strategy development
Source: eLife. 2024 Jan 30;12:RP87559. doi: 10.7554/eLife.87559 (PMC10942592; doi:10.7554/eLife.87559)
Supplement: Figure 3—source data 1. [file elife-87559-fig3-data1.xlsx]

## Sheet: Figure 3
Fig. 3F
mTFP1+mVenus	Slack-mTFP1 + Nav1.6-mVenus
2.89109	11.7935
4.21895	6.04815
1.83194	14.5105
2.55976	18.2369
2.03278	23.7044
0.602591	11.6807
3.40032	16.6723
2.59257	19.3967
4.80853	25.3428
0.468348	6.06001
1.06175	14.5236
7.65304	20.263
	19.9482
	11.2277
Fig. 3G
Fc/Fy	apparent FRET efficiency (%)
2.02568	11.7935
0.99174	6.04815
1.74688	14.5105
1.7833	18.2369
2.02736	23.7043
1.25896	11.6807
1.73665	16.6723
2.23794	19.3967
3.24945	25.3428
0.842138	6.06001
3.29732	14.5236
5.17239	20.263
2.90664	19.9482
1.61498	11.2277
Fig. 3H
Fc/Fy	apparent FRET efficiency (%)
2.55011	2.89109
2.48998	4.21895
1.53523	1.83194
2.02523	2.55976
3.18411	2.03278
3.77304	0.602591
4.60556	3.40032
2.53009	2.59257
3.46854	4.80853
5.42403	0.468348
1.08182	1.06175
4.57764	7.65304
