# Supplementary material for: Coupling of Slack and NaV1.6 sensitizes Slack to quinidine blockade and guides anti-seizure strategy development
Source: eLife. 2024 Jan 30;12:RP87559. doi: 10.7554/eLife.87559 (PMC10942592; doi:10.7554/eLife.87559)
Supplement: Figure 4—source data 1. [file elife-87559-fig4-data1.xlsx]

## Sheet: Figure 4
Fig. 4A
quinidine (μΜ)	Slack												Slack(Nav1.6)
0.3													1.03064	0.88264	0.953773
1	1.00049												0.837336	0.678747	0.753882
3	0.951215	0.979962											0.652369	0.36692	0.489252
10	0.90818	0.931208	0.943294										0.304515	0.171334	0.228416
30	0.883051	0.8295	0.756805										0.125726	0.0519225	0.080796
100	0.531591	0.457299	0.603888										0.01
300	0.212444	0.283191	0.336247
1000	0.0870154	0.0549291
Fig. 4C
quinidine (μΜ)	KCNT1+GFP														KCNT1+Linker1														KCNT1+Linker2														KCNT1+Linker3
1	1.00995	1.01998				0.914798	0.994	1.07121	0.880307																																		1.00778	0.896773	0.911284	1.01206	0.966782
3	0.996394	0.969212	0.997675	1.0718			0.863	0.944811				0.934013						0.992907	1.02275						0.970026				1.06833	0.96248		0.919912	0.942329	0.951095	1.03011									1.10061	0.92745		0.968355	0.877022
10	0.925408	0.811334	0.979668	0.962233		0.925023	0.830531	0.758548				0.919502			1.00026	0.896327			0.824904			0.899482		0.928171	0.805809				1.15214	0.931051	0.876664	0.827459	0.821094	0.893681	0.83869								0.910493		0.853151		1.04127	0.909955
30	0.808829		0.813457	0.684551		0.768369	0.688437	0.649445	0.658161	0.86772						0.838002	0.745752	0.625346		0.791286	0.653034	0.787115	0.861748	0.614248	0.475704				0.768524	0.843031		0.682692	0.749356	0.656139	0.651739	0.699178							0.632222		0.566947		0.777637	0.60857
100	0.561354		0.493762	0.322115	0.556295	0.219142	0.505906	0.472181	0.430564	0.549886	0.533327	0.32415			0.534929	0.590235	0.613084	0.531716	0.618511	0.522572	0.548878		0.492218	0.291693	0.17082				0.488734	0.488232	0.47441				0.456423	0.4288							0.534537		0.349642	0.499755	0.228638	0.444947
300	0.326045		0.294136	0.125751		0.096958	0.291657			0.176518		0.074094			0.0667681	0.147008	0.358205	0.276672	0.3467	0.259711	0.103191		0.162186	0.12218	0.090554				0.174945	0.155032	0.0876691		0.565109	0.105595	0.213822								0.252844		0.114336	0.064104	0.071864	0.1405
1000	0.0663661		0.0969884							0.020541							0.094643	0.138113	0.0766741	0.0999648	0.030202		0.0287494						0.048431		0.0187012				0.07336
	Slack(GFP)		Slack(DI-II linker)		Slack(DII-III linker)		Slack(DIII-IV linker)		Slack(NaV1.6-N)		Slack(NaV1.6-C)		Slack(NaV1.5-N)		Slack(NaV1.5-C)
	Mean	SEM	Mean	SEM	Mean	SEM	Mean	SEM	Mean	SEM	Mean	SEM	Mean	SEM	Mean	SEM
Quinidine IC50	1.927	0.06647	1.937	0.09623	1.925	0.09712	1.832	0.09114	1.5	0.05672	1.64	0.08064	1.8	0.08657	1.575	0.1027
Fig. 4E
quinidine (μΜ)	Slack(GFP)													Slack(NaV1.6-N+NaV1.6-C)
1	1.00995	1.01998				0.914798	0.994	1.07121	0.880307					0.995719	0.971617	0.990087	1.04175			0.932421
3	0.996394	0.969212	0.997675	1.0718			0.863	0.944811				0.934013		0.960768	0.954039	0.972632	0.953166	0.94538	0.917964
10	0.925408	0.811334	0.979668	0.962233		0.925023	0.830531	0.758548				0.919502		0.896242	0.853655	0.89109	0.748449	0.745138	0.84923	0.740224	0.827808
30	0.808829		0.813457	0.684551		0.768369	0.688437	0.649445	0.658161	0.86772				0.606819	0.442304	0.645047	0.385147	0.318531	0.434886		0.482834	0.528687	0.432925	0.539253
100	0.561354		0.493762	0.322115	0.556295	0.219142	0.505906	0.472181	0.430564	0.549886	0.533327	0.32415		0.31778	0.23014	0.256992	0.181945	0.085574	0.24259		0.090029	0.136277	0.087024
1000	0.326045		0.294136	0.125751		0.096958	0.291657			0.176518		0.074094		0.0909879	0.0159484	0.107619	0.0282823	0.0374249	0.108933
3000	0.0663661		0.0969884							0.020541
Fig. 4F
quinidine (μΜ)	Slack+NaV1.6-N+NaV1.6-C
0.1	0.98						0.99
0.3	0.843783		0.908087	0.968237	0.863003		0.823418	0.910394		0.940021
1	0.589614	0.768749		0.769042	0.658644	0.661439	0.54475	0.828608	0.660284	0.770004
3		0.566673	0.483328		0.412008	0.445295	0.411567	0.631345	0.412998
10	0.307902	0.331915	0.244275				0.305201	0.496277	0.238533
30	0.16446	0.166616	0.110182		0.16708		0.124476		0.153363
100	0.0153885		0.0958614		0.0208389		0.0945299
300
1000
Fig. 4I
quinidine (μΜ)	Slack(Nav1.5)																			Slack(Nav1.6)																			Slack(NaV1.5/6NC)
0.03																				0.948494	0.958711	1.04681	0.989678	0.974	0.992951	0.931768		1.00787	0.906619			0.931131			0.867576	0.982236
0.1																					0.732561	0.850915	0.88	0.897		0.867412	1.04148	0.872586	0.826903	0.749566	0.786948	1.0644				0.802252			0.806957	0.891997	0.967234	1.03292	0.651793	0.823414	1.02522
0.3																				0.705802	0.51091	0.878202	0.654	0.674	0.765912		0.742166	0.887166	0.809148	0.725887	0.56104	0.877405	0.760037	0.845697	0.549099	0.440093		0.915028	0.722602	0.819382	0.987367	0.569509	0.521434	0.708985	0.737711
1	0.909683						0.972536		0.859106											0.588		0.621836	0.483	0.37	0.555203	0.379949	0.65301	0.598183	0.392563	0.637567	0.440122	0.550453	0.446502	0.573636	0.473853	0.196405	0.463888	0.756224	0.516342	0.762278	0.521558	0.481726	0.372487	0.536696	0.459923	0.775374	0.55381
3	0.794723	0.808544		0.928441			0.648313	1.1557												0.25	0.327	0.183159	0.167	0.371	0.325797	0.210619	0.355951	0.415777	0.0101274	0.562635	0.323272	0.350926		0.363094	0.316905	0.147943	0.246046	0.462212	0.336084	0.601325	0.325609	0.298089	0.308361	0.30871	0.308047	0.530018	0.363974
10	0.804469	0.771019		0.508881	0.633525		0.47039	0.843122	0.646204											0.027	0.173	0.0914374		0.123		0.0736105	0.0760426			0.34813	0.12305	0.205831		0.267711	0.127612	0.099517		0.225856	0.193457	0.288958	0.236107	0.171892	0.189943	0.165711	0.189482	0.407074	0.294019
30	0.632812	0.721162	0.446781	0.355087	0.367196	0.36548	0.378303	0.87647	0.440613																					0.257474	0.064088	0.091883		0.175446	0.061929	0.020405		0.179263	0.128416	0.164024	0.106007	0.103196	0.101935	0.137918	0.089138	0.270261	0.171547
100	0.337045	0.513711	0.238385	0.21566	0.255021	0.244564																																	0.060799						0.037262		0.11319
300	0.187379		0.150991	0.189123
1000	0.085116		0.059856	0.078075

## Sheet: Figure 4–figure supplement 1
Figure 4–figure supplement 1A
NaV1.2(Slack)	NaV1.5(Slack)	NaV1.6(Slack)
0.173	0.182	0.173
0.164	0.126	0.353
0.557	0.644	0.161
0.396	0.199	0.649
0.182	0.558	0.378
0.171
Figure 4–figure supplement 1B
NaV1.5(Slack)	NaV1.5/6NC(Slack)	NaV1.5/6N(Slack)	NaV1.6(Slack)
2.6646	0.64643	1.5132	1.2565
1.9572	0.73311	1.49	0.42192
3.0657	0.85627	1.6399	0.82398
3.9986	1.5516	3.0022	0.4397
2.2885	1.1428	1.2626	0.51342
1.4677	2.0761	4.4302	1.6966
2.821	1.4586	1.176	1.4367
2.3377	1.5203	1.7395	0.35115
2.7452	1.5284	2.1998
	0.99163	2.1606
	0.69209
	0.92682
	0.95428
