# Supplementary material for: Coupling of Slack and NaV1.6 sensitizes Slack to quinidine blockade and guides anti-seizure strategy development
Source: eLife. 2024 Jan 30;12:RP87559. doi: 10.7554/eLife.87559 (PMC10942592; doi:10.7554/eLife.87559)
Supplement: Figure 5—source data 1. [file elife-87559-fig5-data1.xlsx]

## Sheet: Figure 5
Fig. 5B
quinidine (μΜ)	Slack(NaV1.5/6NC)									Slack(NaV1.5/6NC)+Slack-N									Slack(NaV1.5/6NC)+Slack-C
0.1	0.806957	0.891997	0.967234	1.03292	0.651793	0.823414	1.02522					0.756739	1.00229	0.968955	0.981471
0.3	0.722602	0.819382	0.987367	0.569509	0.521434	0.708985	0.737711					0.626955	0.87237	0.788069	0.849025
1	0.516342	0.762278	0.521558	0.481726	0.372487	0.536696	0.459923	0.775374	0.55381	0.831398	0.706858	0.450186	0.613635	0.644144	0.6942	0.602754			0.939538	0.789828	0.874104	0.868555	0.868718	1.05106
3	0.336084	0.601325	0.325609	0.298089	0.308361	0.30871	0.308047	0.530018	0.363974	0.556136	0.607866	0.304881	0.309885	0.568246	0.512631	0.412749			0.666711	0.702032	0.650407	0.928691	0.756571	0.779421	0.91568
10	0.193457	0.288958	0.236107	0.171892	0.189943	0.165711	0.189482	0.407074	0.294019	0.311233	0.195997	0.182889	0.148139	0.404454	0.180622	0.374572			0.651679	0.556255	0.45106	0.727895	0.550503	0.40847	0.701416
30	0.128416	0.164024	0.106007	0.103196	0.101935	0.137918	0.089138	0.270261	0.171547	0.195926	0.180707	0.113008	0.0708168			0.328232			0.38977	0.480196		0.75218	0.520869	0.179615	0.640611
100	0.060799						0.037262		0.11319	0.100442	0.06094					0.157551			0.222476	0.214864		0.362731	0.369372	0.0890162	0.429257
Fig. 5C
quinidine (μΜ)	Slack(NaV1.6)																			Slack(NaV1.6)+Slack-C
0.03	0.948494	0.958711	1.04681	0.989678	0.974	0.992951	0.931768		1.00787	0.906619			0.931131			0.867576	0.982236
0.1		0.732561	0.850915	0.88	0.897		0.867412	1.04148	0.872586	0.826903	0.749566	0.786948	1.0644				0.802252
0.3	0.705802	0.51091	0.878202	0.654	0.674	0.765912		0.742166	0.887166	0.809148	0.725887	0.56104	0.877405	0.760037	0.845697	0.549099	0.440093		0.915028	0.984268				0.989459	0.950464
1	0.588		0.621836	0.483	0.37	0.555203	0.379949	0.65301	0.598183	0.392563	0.637567	0.440122	0.550453	0.446502	0.573636	0.473853	0.196405	0.463888	0.756224	0.977422	0.885663	0.894018			0.877365
3	0.25	0.327	0.183159	0.167	0.371	0.325797	0.210619	0.355951	0.415777	0.0101274	0.562635	0.323272	0.350926		0.363094	0.316905	0.147943	0.246046	0.462212	0.954384	0.860626	0.859372	0.691464	0.867237	0.806316
10	0.027	0.173	0.0914374		0.123		0.0736105	0.0760426			0.34813	0.12305	0.205831		0.267711	0.127612	0.099517		0.225856	0.791173		0.652991	0.388685	0.56044	0.609076
30											0.257474	0.064088	0.091883		0.175446	0.061929	0.020405		0.179263	0.557794		0.385354	0.237303	0.321013	0.370284
100																				0.290011		0.21652	0.176279		0.173647
300																				0.17731		0.119138	0.093632		0.082777
1000																									0.026143
