# Supplementary material for: Coupling of Slack and NaV1.6 sensitizes Slack to quinidine blockade and guides anti-seizure strategy development
Source: eLife. 2024 Jan 30;12:RP87559. doi: 10.7554/eLife.87559 (PMC10942592; doi:10.7554/eLife.87559)
Supplement: Figure 6—source data 1. [file elife-87559-fig6-data1.xlsx]

## Sheet: Figure 6
Fig. 6B
quinidine (μΜ)	K629N													K629N+NaV1.6
0.03															0.916196	0.930665			0.907678
0.1														0.584486	0.864966	0.742993	0.31203	0.669063	0.759882	1.0312	0.975697
0.3						0.983022	0.934597	0.946794						0.471892	0.299502	0.578545	0.086253	0.256777	0.773275	0.674539	0.617878
1	0.938303	0.994699	0.708853	0.774585	0.90117	0.82339	0.778016	1.0191						0.365428	0.17668	0.300507	0.01552	0.177667	0.675293	0.508542
3	0.768324	0.762828	0.533391	0.633139	0.795325	0.684										0.213867	0	0.173732
10	0.654761	0.635683	0.468156	0.54375	0.623979	0.624609	0.630281									0.126102	0	0.099164
30	0.297386	0.446313	0.30945	0.347225	0.349143	0.366136	0.444692									0.068962	0	0.060534
100	0.028562	0.131353	0.05821	0.042387	0.028035	0.129326	0.13201
300		0.045535	0.002698		0.0010599		0.000304
Fig. 6C
quinidine (μΜ)	R950Q													R950Q+NaV1.6
0.03														0.990105	0.939163		0.873012
0.1														0.776591	0.967044	0.785574	0.589608
0.3														0.609211	0.706209	0.534817	0.358985	0.597415
1		0.814249	1.15042	0.992368	0.833079	0.85069	1.03103	0.82529						0.452734	0.550134	0.449675	0.184539	0.26328
3		0.894561	0.818052	0.97608	0.620132		0.880172	0.627444							0.418081	0.292897	0.092333
10		0.834774	0.394811	0.916793	0.530236	0.776802	0.728672	0.402479							0.317161	0.180163	0.049678
30		0.508477		0.656256	0.337667	0.404653	0.544911	0.217495							0.224344	0.098138	0.02108
100		0.1788		0.198173	0.138752	0.091925	0.228598	0.082296
300		0.035504		0.055439	0.077074	0.006603	0.024761	0.039937
Fig. 6D
quinidine (μΜ)	K985N													K985N+NaV1.6
0.1														0.854641		0.943192	0.881268	0.958984
0.3														0.756613		0.933058	0.853348	0.896074
1		0.933269	1.05085	0.974229	0.939608									0.683342	0.462124	0.613453	0.727939	0.845097	0.86399
3	0.921791	0.918741	0.967488	0.940017	0.835846									0.481223	0.601011	0.400693	0.307773	0.360005	0.540898	0.3493
10	0.743157	0.796015	0.936012		0.744755									0.287605	0.35589		0.088455	0.118404		0.132487
30	0.535483	0.61034	0.677097		0.551492										0.172338	0.203752	0.030658	0.055318		0.040487
100	0.119122	0.238254	0.328598	0.490442	0.187378
300	0.000818		0.087832	0.097423	0.03575

## Sheet: Figure 6–figure supplement 1
Figure 6–figure supplement 1A
NaV1.6	NaV1.6 (SlackK629N)	NaV1.6 (SlackR950Q)	NaV1.6 (SlackK985N)
0.52811	0.56966	0.73266	0.35994
0.61123	0.25589	0.5619	0.88006
2.5633	0.47937	1.6356	0.29712
6.4744	0.77561	0.24046	1.3968
1.1663	0.87011	0.65319	0.58014
0.33532	0.53702	1.0371	0.15255
0.5934	0.73782	0.64729	0.29496
3.522	0.23383	0.41525	1.5254
1.5824	2.215	1.5994
0.416	3.7092	1.5395
0.73867	0.29385	1.8935
	0.118	0.95462
	0.4959	0.2759
	0.628
	1.5
	2.0772
	1.9444
Figure 6–figure supplement 1B
Voltage (mV)		SlackR950Q(NaV1.6)					SlackR950Q(NaV1.6)+100 nM TTX
-120		-0.01818	-0.00285	-0.0033	-0.00799	-0.02479	-0.01485	-0.00066	-0.00071	-0.00455	-0.00975
-110		-0.01267	-0.00369	-0.0017	-0.00526	-0.01696	-0.00923	-0.00103	-0.00185	-0.00413	0.001589
-100		-0.00641	-0.00218	-0.00185	-0.00357	-0.00894	-0.00359	-0.00067	-0.00122	-0.00395	-0.00174
-90		-0.00106	1.95e-06	-0.00044	0.000386	-0.00917	-0.00126	1.39e-05	0.000161	-0.00029	-0.00077
-80		0.005319	0.005067	0.002114	0.00523	0.001386	0.002452	0.001557	0.002153	0.006414	0.001615
-70		0.011972	0.014275	0.006327	0.014194	0.012866	0.009847	0.004008	0.005876	0.015971	-0.0048
-60		0.018936	0.03044	0.011212	0.030812	0.032888	0.012079	0.007765	0.01263	0.032182	-0.01548
-50		0.025986	0.048997	0.021829	0.031319	0.0283	0.012052	0.014522	0.021502	0.053854	-0.01175
-40		0.033231	0.074913	0.033281	0.055694	0.053629	0.021548	0.024762	0.034748	0.079467	0.011507
-30		0.058086	0.111263	0.052634	0.090271	0.106219	0.049941	0.034571	0.049252	0.124019	0.055868
-20		0.120915	0.154409	0.086414	0.130652	0.141519	0.111032	0.049469	0.067474	0.159662	0.097177
-10		0.194862	0.204402	0.115956	0.20706	0.211208	0.185145	0.070092	0.097053	0.23536	0.156749
0		0.307958	0.262906	0.160971	0.271117	0.24869	0.263955	0.091315	0.118734	0.283644	0.21381
10		0.395731	0.335704	0.209172	0.382255	0.319408	0.346244	0.111902	0.148088	0.360942	0.241693
20		0.506687	0.407282	0.265306	0.491708	0.315272	0.434964	0.137193	0.188434	0.463209	0.270148
30		0.588553	0.478088	0.322868	0.564953	0.573214	0.466618	0.159383	0.226439	0.493889	0.305862
40		0.621545	0.54887	0.388015	0.712948	0.524964	0.532239	0.195106	0.263982	0.566765	0.322315
50		0.673902	0.629588	0.474479	0.764234	0.526462	0.578996	0.225782	0.306886	0.642927	0.347189
60		0.724198	0.712056	0.561213	0.815091	0.63471	0.598167	0.241622	0.343722	0.791383	0.362683
70		0.802803	0.799015	0.66515	0.916621	0.687335	0.651248	0.241284	0.402775	0.811682	0.397626
80		0.824315	0.876968	0.767544	0.979915	0.74976	0.716173	0.263654	0.433734	0.856397	0.425857
90		0.911447	0.943259	0.883257	0.95418	0.839877	0.78692	0.247054	0.495731	0.88462	0.48999
100		1	1	1	1	1	0.864662	0.259646	0.522487	0.808181	0.53845
