# Supplementary material for: Coupling of Slack and NaV1.6 sensitizes Slack to quinidine blockade and guides anti-seizure strategy development
Source: eLife. 2024 Jan 30;12:RP87559. doi: 10.7554/eLife.87559 (PMC10942592; doi:10.7554/eLife.87559)
Supplement: Figure 7—source data 1. [file elife-87559-fig7-data1.xlsx]

## Sheet: Figure 7
Fig. 7A
SlackWT +NaV1.5/6NC	SlackG288S +NaV1.5/6NC	SlackG288S +NaV1.5/6NC+Slack-C
45.7063	1343.04	146.626
30.7141	100.196	708.842
34.4261	234.543	175.227
163.431	350.711	132.744
141.804	432.674	76.2668
118.632	726.994	294.933
112.282	1534	28.7317
78.7869	448.57	385.82
22.7698	637.445	81.6509
25.2011		69.5167
13.4787
103.175	264.343	523.85
17.5164	247.186
12.6766	343.493	268.179
14.4607	193.575	385.111
5.44739	1131.68
28.2583	483.821
45.8459	835.724
103.298
Fig. 7B
SlackWT +NaV1.5/6NC	SlackR398Q +NaV1.5/6NC	SlackR398Q +NaV1.5/6NC+Slack-C
45.7063	1097.54	122.011
30.7141	106.98	137.668
34.4261	26.9606	43.0094
163.431	142.697	71.4533
141.804	413.043	13.2912
118.632	472.866	65.8624
112.282	20.9399	6.78008
78.7869	169.129	40.8888
22.7698	58.2735	301.448
25.2011	151.568	335.736
13.4787	561.561	346.716
103.175	41.1991	57.6631
17.5164	358.111	28.2181
12.6766	30.9273	88.1375
14.4607	310.904	48.1832
5.44739	404.011
28.2583	746.111
45.8459	77.7352
103.298	203.51
	380.939
	419.377
Fig. 7E
Time (min)	GFP												SlackG269S+GFP												SlackG269S+Slack-C
10	2	1	7	2	2	2	2	2	2	2	2		2	2	6	2	2	2	2	7	2	2	2	2	2	2	2	2	2	2	7	2	2	2	1	2
20	5	2	3	2	2	2	2	2	2	2	2		2	2	4	2	2	7	5	3	2	5	2	2	2	2	3	2	2	2	3	2	2	2	2	5
30	2	2	5	3	2	5	2	2	4	2	2		5	5	6	3	5	4	6	5	5	3	2	5	4	4	3	5	5	5	3	2	2	5	4	3
40	5	5	4	4	5	3	4	2	3	2	3		4	6	5	3	4	3	5	6	3	3	2	3	3	5	5	3	5	4	5	5	2	3	3	3
50	5	3	5	3	5	4	4	2	3	2	3		5	5	5	4	4	3	5	5	4	3	5	6	3	3	3	3	3	4	5	2	2	5	3	3
60	4	3	4	2	3	2	2	2	5	4	3		5	6	5	4	5	3	4	4	3	3	4	5	2	3	4	3	2	3	4	2	3	4	2	4
70	3	2	3	3	3	2	2	5	3	3	3		5	4	4	4	5	4	4	4	4	3	4	3	2	3	2	5	4	5	4	2	4	3	2	4
80	3	2	4	4	2	2	3	3	4	2	2		4	4	6	4	4	3	4	4	4	3	4	3	3	3	2	3	3	3	4	2	2	3	2	4
90	4	2	3	2	2	2	4	4	3	4	2		5	7	7	4	3	4	3	3	3	4	4	4	3	3	2	3	3	2	3	2	2	3	2	5
100	4	4	5	3	2	4	2	4	3	3	4		7	7	7	4	3	4	3	3	4	4	3	4	4	4	4	2	2	4	3	2	2	4	2	4
110	3	2	7	2	2	2	2	2	2	3	3		3	5	7	4	4	4	3	3	3	4	3	3	3	4	3	3	2	3	3	2	4	4	2	5
120	2	2	7	2	4	2	2	3	2	4	4		4	7	9	3	4	2	3	4	3	3	3	4	3	3	2	4	3	2	3	2	2	4	2	5
Fig. 7F
GFP	SlackG269S+GFP	SlackG269S+Slack-C
42	51	34
30	60	39
57	71	35
32	41	38
34	45	36
32	43	39
31	47	47
33	51	27
36	40	29
33	40	42
33	38	27
	44	47
Fig. 7G
	stage I~V	stage VI~IX
GFP	90.91	9.09
SlackG269S+GFP	41.67	58.33
SlackG269S+Slack-C	91.67	8.33

## Sheet: Figure 7–figure supplement 1
Figure 7–figure supplement 1A
Scn8a+/+	Scn8a+/-
-4.79	-0.18
-5.8	1.34
-5.77	-1.04
-2.93	-2.04
-2.69	-2.47
-1.59	-2.66
-3.75	-4.39
-2.5	-2.5
-1.53	-3.3
-6.16	-3.3
-3.88	-3.42
-3.91	-1.86
-6.96	-2.17
-3.6
Figure 7–figure supplement 1B
Scn8a+/+	Scn8a+/-
-6.38	0.27
-5.95	-1.19
-5.43	-2.11
-3.97	-1.53
-3.27	-4.55
-3.14	-3.02
-3.88	-4.67
-2.44	-1.95
-3.63	-3.72
-8.03	-4.58
-4.39	-3.6
-5.46	-2.62
-8.18	-2.96
-5.86
